# Supplementary material for: Structural basis for assembly of vertical single β-barrel viruses
Source: PubMed Central journal article supplement (PMC6414509; doi:10.1038/s41467-019-08927-2), 2019-03-12
Supplement: 41467_2019_8927_MOESM3_ESM.pdf [file 41467_2019_8927_MOESM3_ESM.pdf]

## **Description of Additional Supplementary Files**

File Name: Supplementary Movie 1

Description: Flexibility of the HCIV-1 vertex complex. Morphing between the two 3D reconstructed conformations of the HCIV-1 vertex complex (green, open conformation; red, close conformation).
